# Supplementary material
Source: PubMed Central journal article supplement (PMC4785815)
Supplement: raap028130.ww1_default.pdf [file raap028130.ww1_default.pdf]

## **Supplementary figure and tables**

Supplementary Figure A. Flowchart of register sources used to assemble the study populations.

Supplementary Table A. Seminal studies of non-melanoma skin cancer in rheumatoid arthritis (RA); number of events, type of events and relative risks.

Supplementary Table B. Definitions, ICD codes and source of potential confounders used for statistical adjustments.

Supplementary Table C. Diagnosis codes according to International Classification of Disease version 10 and 7 (ICD10/ ICD7) used to define Rheumatoid Arthritis (RA) and related diseases, and outcomes

Supplementary Table D. Occurrence and hazard ratios (HR) with 95% confidence intervals (CI) of a second primary squamous cell cancer (SCC) and a second primary basal cell cancer (BCC) during follow-up. 74 TNFi-treated patients with rheumatoid arthritis (RA) and a history of at least one in situ or invasive SCC before start of follow-up were compared with 466 biologics-naïve patients with RA and a history of at least one in situ or invasive SCC before start of follow-up. 91 TNFi-treated patients with RA and a history of at least one BCC before start of follow-up were compared with 250 biologics-naïve patients with RA and a history of at least one BCC before start of follow-up

Supplementary Table E. Occurrence and hazard ratios (HR) of first invasive or in situ squamous cell cancer (SCC) in 7,817 rheumatoid arthritis (RA) - patients initiating TNFi as first biologic 2005-2012 (76 SCC, comparison 1 & 2) or 12,558 rheumatoid arthritis (RA) - patients initiating TNFi as first biologic 1998-2012 (191 SCC, comparison 3), compared with 3 different definitions of the biologics-naïve RA cohort

Supplementary Table F. Impact of immunosuppressive drug use on hazard ratios (HR) of squamous cell cancer (SCC) in 4,815 incident RA-patients starting TNFi 2005-2012, compared with 23,139 incident biologics-naïve Swedish rheumatoid arthritis (RA)-patients, h 95% confidence intervals (CI) and of basal cell cancer (BCC) in 4,782 incident RA-patients starting TNFi 2005-2012, compared with 22,981 incident biologics-naïve Swedish RA-patients.

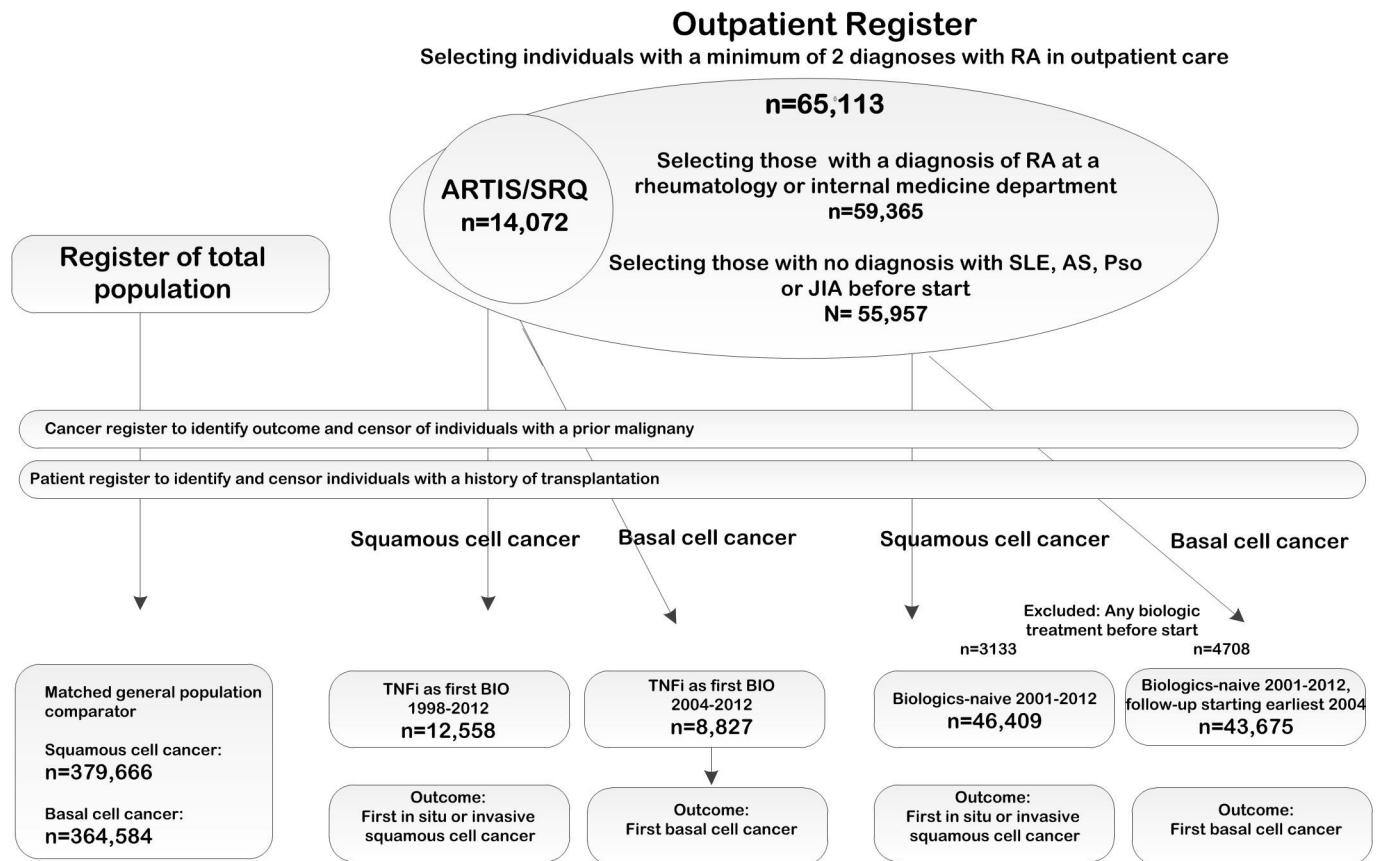

RA= Rheumatoid Arthritis; ARTIS/SRQ= Anti-Rheumatic Treatment in Sweden/Swedish Rheumatology Quality of care Register; SLE=Systemic Lupus Erythematosus; AS=Ankylosing Spondylitis; PSO=Psoriatic Arthritis; JIA= Juvenile Idiopathic Arthritis

**Supplementary Figure A.**

**Supplementary Table A. Seminal studies of non-melanoma skin cancer in rheumatoid arthritis (RA); number of events, type of events and relative risks.**

|                                                                                                                                                                                                                                                                                                                                                                                                                                                                                                                                                            | <b>Relative Risk<br/>(95% confidence interval)</b> |
|------------------------------------------------------------------------------------------------------------------------------------------------------------------------------------------------------------------------------------------------------------------------------------------------------------------------------------------------------------------------------------------------------------------------------------------------------------------------------------------------------------------------------------------------------------|----------------------------------------------------|
| <b>Biologics-naive RA versus General population</b>                                                                                                                                                                                                                                                                                                                                                                                                                                                                                                        |                                                    |
| <b>1993 Gridley et al.<sup>1</sup> Swedish population based:</b><br>27 NMSC (bio-naive RA)                                                                                                                                                                                                                                                                                                                                                                                                                                                                 | SIR 1.2 (0.8 to 1.7)                               |
| <b>1996 Mellekjær et al.<sup>2</sup> Danish population based:</b><br>51 SCC (bio-naive RA)<br>253 BCC (bio-naive RA)                                                                                                                                                                                                                                                                                                                                                                                                                                       | RR 1.3 (1.1 to 1.4)<br>RR 1.4 (1.1 to 1.9)         |
| <b>2005 Chakravarty et al.<sup>3</sup> NDB database</b><br>738 NMSC (bio-naive RA)                                                                                                                                                                                                                                                                                                                                                                                                                                                                         | HR 1.2 (1.0 to 1.4)*                               |
| <b>2005 Askling et al.<sup>4</sup> ARTIS/SRQ</b><br>374 NMSC (RA Inpatient cohort)<br>5 NMSC (Early RA cohort)                                                                                                                                                                                                                                                                                                                                                                                                                                             | SIR 1.7 (1.5 to 1.8)<br>SIR 0.7 (0.2 to 1.6)       |
| <b>2012 Mercer et al.<sup>5</sup> BSRBR</b><br>39 NMSC (bio-naive RA)                                                                                                                                                                                                                                                                                                                                                                                                                                                                                      | SIR 1.8 (1.3 to 2.5)                               |
| <b>2013 Dreyer et al.<sup>6</sup> DANBIO</b><br>34 NMSC (bio-naive RA)                                                                                                                                                                                                                                                                                                                                                                                                                                                                                     | SIR 1.8 (1.3 to 2.5)                               |
| <b>TNFi-treated RA versus General Population</b>                                                                                                                                                                                                                                                                                                                                                                                                                                                                                                           |                                                    |
| <b>2005 Askling et al.<sup>4</sup> ARTIS/SRQ</b><br>TNFi (11 NSMC) vs. GenPop control                                                                                                                                                                                                                                                                                                                                                                                                                                                                      | SIR 3.6 (1.8 to 6.5)                               |
| <b>TNFi-treated versus Biologics-naive RA</b>                                                                                                                                                                                                                                                                                                                                                                                                                                                                                                              |                                                    |
| <b>2005 Chakravarty et al.<sup>3</sup> NDB database</b><br>TNFi non MTX vs. bio-naive RA<br>TNFi with MTX vs. bio-naive RA                                                                                                                                                                                                                                                                                                                                                                                                                                 | HR 1.2 (1.0 to 1.6)<br>HR 2.0 (1.5 to 2.6)         |
| <b>2007 Wolfe et al.<sup>7</sup> NDB database</b><br>TNFi (623 NMSC) vs. bio-naive RA                                                                                                                                                                                                                                                                                                                                                                                                                                                                      | OR 1.5 (1.2 to 1.8)                                |
| <b>2011 Amari et al.<sup>8</sup> Administrative data</b><br>TNFi (283 NMSC) vs. bio-naive RA                                                                                                                                                                                                                                                                                                                                                                                                                                                               | RR 1.4 ( 1.2 to1.6)                                |
| <b>2012 Mercer et al.<sup>5</sup> BSRBR</b><br>TNFi (150 BCC) vs. bio-naive RA<br>TNFi (23 SCC) vs. bio-naive RA                                                                                                                                                                                                                                                                                                                                                                                                                                           | HR 1.2 (0.8 to 1.7)<br>HR 1.8 (0.6 to 5.4)         |
| <b>2013 Dreyer et al.<sup>6</sup> DANBIO</b><br>TNFi (42 NMSC) vs. bio-naive RA                                                                                                                                                                                                                                                                                                                                                                                                                                                                            | HR 1.1 (0.7 to 1.8)                                |
| <b>2013 Haynes et al.<sup>9</sup> 29,555 patients with RA</b><br>TNFi (54 NMSC) vs. bio-naive RA                                                                                                                                                                                                                                                                                                                                                                                                                                                           | HR 0.8 (0.5 to 1.4)                                |
| <b>RCT-data TNFi versus Control</b>                                                                                                                                                                                                                                                                                                                                                                                                                                                                                                                        |                                                    |
| <b>2009 Leombruno et al.<sup>10</sup> 8800 patients with RA</b>                                                                                                                                                                                                                                                                                                                                                                                                                                                                                            | OR 1.3 (0.7 to 2.4)                                |
| <b>2011 Askling et al.<sup>11</sup> &gt;22000 patients across indications</b>                                                                                                                                                                                                                                                                                                                                                                                                                                                                              | HR 2.0 (1.1 to 4.0)                                |
| <p><i>SIR= Standardized Incidence Rate; RR= Relative Risk; HR= Hazard Ratio; OR= Odds Ratio; NMSC= non-melanoma skin cancer; SCC= squamous cell cancer; BCC=basal cell cancer; TNFi= tumor necrosis factor inhibitor, bio-naive= biologics-naive</i></p> <p><i>NDB= The National Data Bank for Rheumatic Diseases, ARTIS/SRQ=Swedish Biologics Register/Swedish Rheumatology Quality Register, DANBIO= Dansk Rheumatologisk Database, BSRBR=British Society for Rheumatology Biologics Register</i></p> <p><i>* Bio-naive RA versus osteoarthritis</i></p> |                                                    |

1. Gridley G, McLaughlin JK, Ekblom A, et al. Incidence of cancer among patients with rheumatoid arthritis. *J Natl Cancer Inst.* 1993;85(4):307-311.
2. Mellekjaer L, Linet MS, Gridley G, Frisch M, Moller H, Olsen JH. Rheumatoid arthritis and cancer risk. *Eur J Cancer.* 1996;32A(10):1753-1757.
3. Chakravarty EF, Michaud K, Wolfe F. Skin cancer, rheumatoid arthritis, and tumor necrosis factor inhibitors. *J Rheumatol.* 2005;32(11):2130-2135.
4. Askling J, Forde CM, Brandt L, et al. Risks of solid cancers in patients with rheumatoid arthritis and after treatment with tumour necrosis factor antagonists. *Ann Rheum Dis.* 2005;64(10):1421-1426.
5. Mercer LK, Green AC, Galloway JB, et al. The influence of anti-TNF therapy upon incidence of keratinocyte skin cancer in patients with rheumatoid arthritis: longitudinal results from the British Society for Rheumatology Biologics Register. *Ann Rheum Dis.* 2012;71(6):869-874.
6. Dreyer L, Mellekjaer L, Andersen AR, et al. Incidences of overall and site specific cancers in TNFalpha inhibitor treated patients with rheumatoid arthritis and other arthritides - a follow-up study from the DANBIO Registry. *Ann Rheum Dis.* 2013;72(1):79-82.
7. Wolfe F, Michaud K. Biologic treatment of rheumatoid arthritis and the risk of malignancy: analyses from a large US observational study. *Arthritis Rheum.* 2007;56(9):2886-2895.
8. Amari W, Zeringue AL, McDonald JR, Caplan L, Eisen SA, Ranganathan P. Risk of non-melanoma skin cancer in a national cohort of veterans with rheumatoid arthritis. *Rheumatology (Oxford).* 2011;50(8):1431-1439.
9. Haynes K, Beukelman T, Curtis JR, et al. Tumor necrosis factor alpha inhibitor therapy and cancer risk in chronic immune-mediated diseases. *Arthritis Rheum.* 2013;65(1):48-58.
10. Leombruno JP, Einarson TR, Keystone EC. The safety of anti-tumour necrosis factor treatments in rheumatoid arthritis: meta and exposure-adjusted pooled analyses of serious adverse events. *Ann Rheum Dis.* 2009;68(7):1136-1145.
11. Askling J, Fahrback K, Nordstrom B, Ross S, Schmid CH, Symmons D. Cancer risk with tumor necrosis factor alpha (TNF) inhibitors: meta-analysis of randomized controlled trials of adalimumab, etanercept, and infliximab using patient level data. *Pharmacoepidemiol Drug Saf.* 2011;20(2):119-130.

**Supplementary Table B. Definitions, ICD codes and source of potential confounders used for statistical adjustments.**

| Potential confounder                      | Definition                                                                                                                               | Source                                                                                   |
|-------------------------------------------|------------------------------------------------------------------------------------------------------------------------------------------|------------------------------------------------------------------------------------------|
| Country of birth                          | Nordic; Other (including missing <0.1%)                                                                                                  | National Population Register                                                             |
| Education level                           | ≤9 yrs; 10-12 yrs; >12yrs; Missing <sup>‡</sup>                                                                                          | The Swedish Register of Education                                                        |
| County (sun-exposure)                     | 4 categories based on CIE weighted total sun irradiation 1999-2011 in Sweden (lat. 55°-69°)                                              | Swedish Meteorological and Hydrological Institute (SMHI)<br>National Population Register |
| Immunosuppressive drug use                | First dispensing of either cyclosporine, cyclophosphamide or azathioprine as registered in the Prescribed Drug Register during follow up | National Prescribed Drug Register                                                        |
| <b>Co-morbidity</b>                       | <b>ICD 10</b>                                                                                                                            |                                                                                          |
| COPD                                      | J41-J44                                                                                                                                  | National Patient Register                                                                |
| Ischemic heart disease                    | I20-I25                                                                                                                                  | National Patient Register                                                                |
| Diabetes mellitus, type 1&2               | E10-E14                                                                                                                                  | National Patient Register                                                                |
| Benign skin disorder †                    | D485, L21,L23-25, L26-27, L30, L40-41, L57.8<br>L71, L82, L93, D485                                                                      | National Patient Register                                                                |
| Invasive malignancy<br>Including melanoma | 140-208                                                                                                                                  | National Cancer Register                                                                 |
| Organ transplantation                     | Z94                                                                                                                                      | National Patient Register                                                                |
|                                           | <b>Surgical procedure codes</b>                                                                                                          |                                                                                          |
| Knee replacement surgery                  | NGB, 8423-8424, 8426                                                                                                                     | National Patient Register                                                                |
| Hip replacement surgery                   | NFB, 8400-8415, 8419                                                                                                                     |                                                                                          |

*The National Population Register* includes data on residency and dates of immigration and emigration for all subjects ever resident in Sweden since 1961 and onwards, and coverage is virtually complete.

*The Swedish Register of Education* is updated annually to contain the highest level of education for each individual from 1985 and onwards.

<sup>‡</sup> Missing: 13.2% (biologics-naïve) 6.7% (TNFi-treated) 8.2 % (General Population).

*The Prescribed Drug Register* contains information on all prescribed drugs dispensed at Swedish pharmacies from July 2005 onwards, with an estimated coverage of close to 100%.

*The National Patient Register* covers virtually all hospital discharges since 1987, and outpatient visits in specialized care e.g., a visit to the rheumatologist, since 2001. Diagnoses are coded according ICD (since 1997: version 10). The coverage of the outpatients component is around 80% overall, but varies with specialty and care-provider.

*The National Cancer Register* is described in detail in methods section

CIE=Commission Internationale de l'Éclairage

COPD=Chronic obstructive pulmonary disease

† Seborrheic dermatitis (L21), Contact (L23-25) and other (L26-27) dermatitis, Eczema (L30), Psoriatic disease (L40-41), Sun dermatitis (L57.8), Rosacea (L71), Seborrheic keratosis (L82), Discoid Lupus (L93), Dysplastic naevi (D485). Actinic keratosis is not included (often co-diagnosed with SCC).

**Supplementary Table C. Diagnosis codes according to International Classification of Disease Swedish versions 10 and 7 (ICD10/ ICD7) used to define Rheumatoid Arthritis (RA) and related diseases, and outcomes**

| <b>Diagnosis</b>                       | <b>Abbreviation</b> | <b>ICD 10</b>                           |                     |
|----------------------------------------|---------------------|-----------------------------------------|---------------------|
| Rheumatoid Arthritis                   | RA                  | M05, M060, M062, M063, M068, M069, M123 |                     |
| Juvenile Idiopathic Arthritis          | JIA                 | M08, M09                                |                     |
| Ankylosing Spondylitis                 | AS                  | M45                                     |                     |
| Psoriatic Arthritis                    | PSA                 | L405, M070, M071, M073                  |                     |
| Systemic Lupus Erythematosus           | SLE                 | M320, M321, M328, M329                  |                     |
| <b>Outcomes</b>                        |                     | <b>SNOMED</b>                           | <b>ICD 10/ICD 7</b> |
| <b>Squamous cell cancer</b>            | SCC                 |                                         | C44/191             |
| Squamous cell cancer in situ           |                     | 80702 and 80701                         |                     |
| Mb Bowen                               |                     | 80812                                   |                     |
| Actinic keratosis with advanced atypia |                     | 72850                                   |                     |
| Invasive                               |                     | 80703                                   |                     |
| <b>Basal cell cancer</b>               | BCC                 | 80913,80931,80932,80933 80953,80903     | C44/191             |

**Supplementary Table D. Occurrence and hazard ratios (HR) with 95% confidence intervals (CI) of a second primary squamous cell cancer (SCC) and a second primary basal cell cancer (BCC) during follow-up. 74 TNFi-treated patients with rheumatoid arthritis (RA) and a history of at least one in situ or invasive SCC before start of follow-up were compared with 466 biologics-naïve patients with RA and a history of at least one in situ or invasive SCC before start of follow-up. 91 TNFi-treated patients with RA and a history of at least one BCC before start of follow-up were compared with 250 biologics-naïve patients with RA and a history of at least one BCC before start of follow-up**

|                             | <b>TNF-treated RA</b><br>N events (pyr; crude inc.) | <b>Biologics-naïve RA</b><br>N events (pyr; crude inc.) | <b>HR</b>           |
|-----------------------------|-----------------------------------------------------|---------------------------------------------------------|---------------------|
| <b>Squamous cell cancer</b> | 10 (390; 2,562)                                     | 97 (1,845; 5,259)                                       | 0.99 (0.44 to 2.10) |
| <b>Basal cell cancer</b>    | 17 (269; 6,310)                                     | 41 (602; 6,810)                                         | 1.19 (0.67 to 2.15) |

HR: Adjusted for age and stratified for sex, country of birth, county, birth year, and education level.

Pyr: Person-years of follow-up

Crude incidence: Number of events per 100.000 person-years of follow-up

**Supplementary Table E. Occurrence and hazard ratios (HR) of first invasive or in situ squamous cell cancer (SCC) in 7,817 rheumatoid arthritis (RA) - patients initiating TNFi as first biologic 2005-2012 (76 SCC, comparisons 1) and 2)) or 12,558 rheumatoid arthritis (RA) - patients initiating TNFi as first biologic 1998-2012 (191 SCC, comparison 3)), compared with 3 different definitions of biologics-naïve RA comparators.**

| Biologics-naïve RA Comparator | Number of patients / number of events in biologics-naïve comparator | HR (95% CI)** TNFi vs. biologics-naïve comparator |
|-------------------------------|---------------------------------------------------------------------|---------------------------------------------------|
| 1. DMARD « switchers »        | 4277/50                                                             | 1.27 (0.82 to 1.97)                               |
| 2. « Stable » MTX users       | 28127/453                                                           | 1.25 (0.96 to 1.63)                               |
| 3. DMARD newstarters          | 10,676/103                                                          | 1.59 (1.19 to 2.12)                               |

DMARD= Disease-Modifying Anti-rheumatic Drug. MTX=Methotrexate.

HRs Adjusted for age, sex, birth year, country of birth, county of residency, educational level and comorbidities up until start of follow-up (hospital admissions/outpatient visits for chronic obstructive pulmonary disease, ischemic heart disease, diabetes mellitus, knee/hip joint replacement surgery, psoriatic disease and any other diagnosis of benign skin disease except actinic keratosis. Patients with a diagnosis of solid organ transplantation and/or invasive malignancy prior to, or during follow-up, were considered not at risk.

1. RA-patients with two or more visits listing RA in the Outpatient Register 2001-2012, initiating a new non-biologic DMARD after 1 July 2006, as noted in the Prescribed Drug Register (1 July 2005 -1 July 2006 serving as baseline period). This definition is supposed to reflect RA patients with unsatisfactory disease control, in need for medication adjustment. The Prescribed Drug Register started in July 2005 and therefore we restricted the TNFi-treated comparator to include only those initiating therapy 2005-2012.

2. RA-patients with two or more visits listing RA in the Outpatient Register 2001-2012, with two consecutive dispensing of methotrexate within 6 months as noted in the Prescribed Drug Register. This is supposed to reflect RA patients stable on methotrexate treatment. The Prescribed Drug Register started in July 2005 and therefore we restricted the TNFi-treated comparator to include only those initiating therapy 2005-2012.

3. RA-patients registered in the Swedish Rheumatology Quality register with new-onset RA 1997-2012 (incident RA) who were followed from the initiation of their first non-biologic DMARD after RA diagnosis.

**Supplementary Table F. Impact of immunosuppressive drug use on hazard ratios (HR) of squamous cell cancer (SCC) in 4,815 incident RA-patients starting TNFi 2005-2012, compared with 23,139 incident biologics-naïve Swedish rheumatoid arthritis (RA)-patients, and of basal cell cancer (BCC) in 4,782 incident RA-patients starting TNFi 2005-2012, compared with 22,981 incident biologics-naïve Swedish RA-patients.**

|                             | TNF-treated RA<br>N events (pyr; crude inc.) | Biologics-naïve RA<br>N events (pyr; crude inc.) | HR 1<br>Adjusted for co-morbidities and demographics | HR 2<br>Further adjusted for immunosuppressive drug use |
|-----------------------------|----------------------------------------------|--------------------------------------------------|------------------------------------------------------|---------------------------------------------------------|
| <b>Squamous cell cancer</b> | 35 (16,082; 218)                             | 259 (75,236; 344)                                | 1.35 (0.93 to 1.96)                                  | 1.28 (0.89-1.86)                                        |
| <b>Basal cell cancer</b>    | 93 (15,837; 587)                             | 548 (74,158; 739)                                | 1.20 (0.95 to 1.53)                                  | 1.17 (0.93-1.49)                                        |

**HR1** Adjusted for age, sex, birth year, country of birth, county of residency, educational level and comorbidities up until start of follow-up (hospital admissions/outpatient visits for chronic obstructive pulmonary disease, ischemic heart disease, diabetes mellitus, knee/hip joint replacement surgery, psoriatic disease and any other diagnosis of benign skin disease except actinic keratosis. Patients with a diagnosis of solid organ transplantation and/or invasive malignancy prior to, or during follow-up, were considered not at risk.

**HR2** Adjusted for all the covariates above (HR1) and for any use of oral cortisone, cyclosporine, cyclophosphamide and/or azathioprine during follow-up

Pyr Person-years of follow-up

Crude inc. Number of events per 100.000 person-years of follow-up

Incident TNFi-treated and biologics-naïve RA defined as patients with RA-diagnosis in the outpatient register earliest 1 July 2005 (no diagnosis with RA in the register 2001-2004).
